# Supplementary material for: Nutritional Quality, Environmental Impact and Cost of Ultra-Processed Foods: A UK Food-Based Analysis
Source: MDPI journal article supplement (doi:10.3390/ijerph19063191), 2022-03-08
Supplement: s1 [file s1]

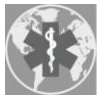

## Supplementary Material

**Table S1.** Shapiro–Wilk test values among dimensions studied per 100 kcal.

| Category                                                     | NRF9.3                                               | GHGE                                               | Cost                                               |
|--------------------------------------------------------------|------------------------------------------------------|----------------------------------------------------|----------------------------------------------------|
| All items                                                    | W = 0.99524,<br>$p$ -value = $1.814 \times 10^{-11}$ | W = 0.54645,<br>$p$ -value < $2.2 \times 10^{-16}$ | W = 0.20872,<br>$p$ -value < $2.2 \times 10^{-16}$ |
| Fruit and vegetables                                         | W = 0.9571,<br>$p$ -value = $1.555 \times 10^{-14}$  | W = 0.54036,<br>$p$ -value < $2.2 \times 10^{-16}$ | W = 0.61444,<br>$p$ -value < $2.2 \times 10^{-16}$ |
| Potatoes, bread, rice, pasta and other starchy carbohydrates | W = 0.9896,<br>$p$ -value = $3.286 \times 10^{-08}$  | W = 0.64448,<br>$p$ -value < $2.2 \times 10^{-16}$ | W = 0.35481,<br>$p$ -value < $2.2 \times 10^{-16}$ |
| Beans, pulses, fish, eggs, meat and other proteins           | W = 0.9812,<br>$p$ -value = $4.539 \times 10^{-14}$  | W = 0.7607,<br>$p$ -value < $2.2 \times 10^{-16}$  | W = 0.28451,<br>$p$ -value < $2.2 \times 10^{-16}$ |
| Dairy and alternatives                                       | W = 0.99099,<br>$p$ -value = 0.0227                  | W = 0.68748,<br>$p$ -value < $2.2 \times 10^{-16}$ | W = 0.22126,<br>$p$ -value < $2.2 \times 10^{-16}$ |
| Drinks                                                       | W = 0.98589,<br>$p$ -value = 0.02606                 | W = 0.5513,<br>$p$ -value < $2.2 \times 10^{-16}$  | W = 0.41501,<br>$p$ -value < $2.2 \times 10^{-16}$ |
| Items that should be eaten less of-ten and in small amounts  | W = 0.97388,<br>$p$ -value = $2.162 \times 10^{-05}$ | W = 0.70617,<br>$p$ -value < $2.2 \times 10^{-16}$ | W = 0.15579,<br>$p$ -value < $2.2 \times 10^{-16}$ |

Since all the  $p$ -value were <0.05, indicating significantly non-normality. Hence non-parametric tests were selected. NRF8.3 = Nutrient-Rich Food Index 8.3, GHGE = Green House Gas Emission.

**Table S2.** Overall median values across dimensions and categories.

| Category                                                      | NRF8.3 | GHGE | Cost |
|---------------------------------------------------------------|--------|------|------|
| All items                                                     | 300    | 418  | 0.5  |
| Fruit and vegetables                                          | 120    | 210  | 0.35 |
| Potatoes, bread, rice, pasta, and other starchy carbohydrates | 260    | 651  | 0.25 |
| Beans, pulses, fish, eggs, meat, and other proteins           | 460    | 470  | 0.62 |
| Dairy and alternatives                                        | 158    | 193  | 0.25 |
| Drinks                                                        | 72     | 42   | 0.26 |
| High fat, salt, or sugar products                             | 400    | 468  | 0.58 |

NRF8.3 = Nutrient-Rich Food Index 8.3, GHGE = Green House Gas Emission.
